# Supplementary material for: Computational Characterization of Undifferentially Expressed Genes with Altered Transcription Regulation in Lung Cancer
Source: MDPI journal article supplement (doi:10.3390/genes14122169), 2023-12-01
Supplement: s1 [file s1]

---

## **Computational characterization of undifferentially expressed genes with altered transcription regulations in lung cancers**

Ruihao Xin<sup>1,2</sup>, Qian Cheng<sup>2,#</sup>, Xiaohang Chi<sup>2,#</sup>, Xin Feng<sup>4,3</sup>, Hang Zhang<sup>2</sup>, Yueying Wang<sup>1</sup>, Meiyu Duan<sup>1</sup>, Tunyang Xie<sup>5</sup>, Xiaonan Song<sup>6</sup>, Qiong Yu<sup>4</sup>, Yusi Fan<sup>6,\*</sup>, Lan Huang<sup>1</sup>, Fengfeng Zhou<sup>1,7,\*</sup>.

1 College of Computer Science and Technology, and Key Laboratory of Symbolic Computation and Knowledge Engineering of Ministry of Education, Jilin University, Changchun, Jilin, China, 130012.

2 College of Information and Control Engineering, Jilin Institute of Chemical Technology, Jilin, Jilin, China, 132000.

3 School of Science, Jilin Institute of Chemical Technology, Jilin, Jilin, China, 132000.

4 Department of Epidemiology and Biostatistics, School of Public Health, Jilin University, Changchun, China, 130012.

5 Centre for Mathematical Sciences, University of Cambridge, Wilberforce Road, Cambridge CB3 0WA, UK

6 College of Software, and Key Laboratory of Symbolic Computation and Knowledge Engineering of Ministry of Education, Jilin University, Changchun, Jilin, China, 130012.

7 School of Biology and Engineering, Guizhou Medical University, Guiyang 550025, Guizhou, China.

# These authors contributed equally to this study.

\* Correspondence may be addressed to Fengfeng Zhou: [ffzhou@jlu.edu.cn](mailto:ffzhou@jlu.edu.cn) . Lab web site: <http://www.healthinformatics-lab.org/> . Phone: +86-431-8516-6024. Fax: +86-431-8516-6024. Correspondence may also be addressed to Yusi Fan: [fan\\_yusi@163.com](mailto:fan_yusi@163.com) .

## Supplementary Table S1

Detailed information of the 13 dark biomarkers in the three datasets. The first three columns “Type”, “Feature” and “Gene” gave the types, transcriptome feature IDs and gene symbols of these 13 dark biomarkers. In each of the three datasets dbB/dbC/dbD, the columns “Flag”, “mqTrans-p”, “raw-p” and “raw-rank” were whether this gene was the dark biomarker in this dataset, t-test p-value of the mqTrans values, t-test p-value of the original expression levels, and its rank based on the ascending order of the t-test p-value among all the 45,782 features.

| Type   | Feature     | Gene       | dbB  |           |          |          | dbC  |           |          |          | dbD  |           |          |          |
|--------|-------------|------------|------|-----------|----------|----------|------|-----------|----------|----------|------|-----------|----------|----------|
|        |             |            | Flag | mqTrans-p | raw-p    | raw-rank | Flag | mqTrans-p | raw-p    | raw-rank | Flag | mqTrans-p | raw-p    | raw-rank |
| Strong | 229625_at   | GBP5       | 1    | 2.11E-02  | 7.42E-01 | 5709     | 1    | 3.87E-06  | 5.70E-02 | 17278    | 1    | 1.97E-02  | 6.40E-01 | 5839     |
| Strong | 208296_x_at | TNFAIP8    | 1    | 3.90E-03  | 6.84E-02 | 28355    | 1    | 3.86E-02  | 4.19E-01 | 7383     | 1    | 3.80E-03  | 5.13E-02 | 24170    |
| Weak   | 228865_at   | C1orf116   | 1    | 8.60E-03  | 9.79E-01 | 482      | 0    | 1.30E-07  | 6.00E-08 | 36844    | 0    | 7.10E-03  | 1.00E-04 | 38132    |
| Weak   | 219856_at   | C1orf116   | 1    | 2.47E-02  | 9.28E-01 | 1606     | 0    | 6.70E-06  | 5.69E-06 | 33567    | 0    | 3.00E-04  | 7.00E-04 | 35603    |
| Weak   | 225786_at   | HNRNPU-AS1 | 1    | 4.40E-02  | 6.78E-01 | 7127     | 0    | 8.41E-05  | 3.88E-05 | 31708    | 1    | 2.17E-02  | 9.56E-02 | 21028    |
| Weak   | 225107_at   | HNRNPA2B1  | 1    | 2.00E-02  | 9.54E-01 | 1030     | 0    | 4.95E-03  | 3.42E-05 | 31840    | 0    | 1.38E-02  | 1.49E-02 | 28951    |
| Weak   | 225932_s_at | HNRNPA2B1  | 1    | 1.00E-02  | 7.14E-01 | 6339     | 0    | 1.91E-03  | 3.70E-07 | 35676    | 0    | 2.34E-02  | 1.56E-02 | 28736    |
| Weak   | 203954_x_at | CLDN3      | 0    | 1.00E-04  | 2.00E-04 | 41536    | 1    | 4.04E-04  | 6.33E-01 | 4349     | 1    | 9.00E-03  | 2.84E-01 | 13581    |
| Weak   | 221088_s_at | PPP1R9A    | 1    | 5.40E-03  | 8.36E-01 | 3616     | 0    | 4.85E-03  | 9.00E-08 | 36624    | 1    | 3.00E-03  | 1.67E-01 | 17606    |
| Weak   | 204994_at   | MX2        | 0    | 1.11E-02  | 2.90E-02 | 32185    | 1    | 3.21E-05  | 1.63E-01 | 12822    | 1    | 5.00E-03  | 8.38E-01 | 2545     |
| Weak   | 211689_s_at | TMPRSS2    | 1    | 3.00E-03  | 6.52E-01 | 7714     | 0    | 1.85E-02  | 1.10E-07 | 36483    | 0    | 2.30E-03  | 1.00E-04 | 37759    |
| Weak   | 205583_s_at | ALG13      | 1    | 2.66E-02  | 6.00E-01 | 8963     | 0    | 2.10E-07  | 3.50E-07 | 35724    | 0    | 5.40E-03  | 1.06E-02 | 29881    |
| Weak   | 205001_s_at | DDX3Y      | 1    | 3.66E-02  | 5.46E-01 | 10262    | 0    | 5.21E-04  | 4.92E-06 | 33710    | 1    | 3.94E-02  | 1.31E-01 | 19219    |

---

## Supplementary Table S2

The lncRNAs overlapping with the 11 dark biomarker genes of lung cancers detected in the three datasets and the 5 dark biomarker genes detected in the TCGA datasets. The first column “Gene” was the gene symbol of the dark biomarkers. Some dark biomarker features were the probeset IDs and shared the same gene symbol. So there were 11 dark biomarker genes. The next five columns “lncRNA”, “Chr”, “Start”, “End” and “S” were the ID, chromosome, start position, end position and strand of the overlapping lncRNA. The column “DB” was the data source where this lncRNA was annotated. The last column “Type” showed whether the lncRNA resided on the same (“sense”) or opposite (“antisense”) strand of the gene. The last column “Phenotype” denoted the three experiments investigated in this study, i.e., lung cancers versus control samples (Lung cancer), late- versus early-stage LUAD (Late LUAD) and late- versus early-stage LUSC (Late LUSC).

| Gene  | lncRNA        | Chr   | Start     | End       | S | DB      | Type      | Phenotype   |
|-------|---------------|-------|-----------|-----------|---|---------|-----------|-------------|
| CLDN3 | HSALNG0058863 | chr7  | 73734949  | 73775454  | + | LncBook | antisense | Lung cancer |
| CLDN3 | HSALNG0058869 | chr7  | 73760753  | 73784181  | - | LncBook | sense     | Lung cancer |
| MX2   | HSALNG0147191 | chr21 | 41357143  | 41369978  | - | RefLnc  | antisense | Lung cancer |
| MX2   | HSALNG0133203 | chr21 | 41362021  | 41367306  | + | LncBook | sense     | Lung cancer |
| MX2   | HSALNG0133206 | chr21 | 41381751  | 41382231  | + | LncBook | sense     | Lung cancer |
| MX2   | HSALNG0133207 | chr21 | 41409317  | 41420581  | - | LncBook | antisense | Lung cancer |
| DDX3Y | HSALNG0141213 | chrY  | 12904849  | 12912525  | + | LncBook | sense     | Lung cancer |
| ALG13 | HSALNG0139549 | chrX  | 111671924 | 111679567 | + | LncBook | sense     | Lung cancer |
| ALG13 | HSALNG0151248 | chrX  | 111706649 | 111711101 | - | HAVANA  | antisense | Lung cancer |
| ALG13 | HSALNG0139553 | chrX  | 111710208 | 111710408 | + | LncBook | sense     | Lung cancer |
| ALG13 | HSALNG0139555 | chrX  | 111745586 | 111747473 | + | LncBook | sense     | Lung cancer |
| ALG13 | HSALNG0139556 | chrX  | 111760568 | 111766891 | - | LncBook | antisense | Lung cancer |

| Gene       | lncRNA        | Chr   | Start     | End       | S | DB        | Type      | Phenotype   |
|------------|---------------|-------|-----------|-----------|---|-----------|-----------|-------------|
| ALG13      | HSALNG0139557 | chrX  | 111763569 | 111772741 | + | LncBook   | sense     | Lung cancer |
| TNFAIP8    | HSALNG0044395 | chr5  | 119249045 | 119279096 | - | LncBook   | antisense | Lung cancer |
| TNFAIP8    | HSALNG0044398 | chr5  | 119341576 | 119344829 | + | LncBook   | sense     | Lung cancer |
| TNFAIP8    | HSALNG0044399 | chr5  | 119341662 | 119355805 | - | LncBook   | antisense | Lung cancer |
| TNFAIP8    | HSALNG0148957 | chr5  | 119398815 | 119399298 | - | FANTOM    | antisense | Lung cancer |
| TMPRSS2    | HSALNG0133209 | chr21 | 41441056  | 41481066  | - | HAVANA    | sense     | Lung cancer |
| TMPRSS2    | HSALNG0133210 | chr21 | 41463611  | 41464310  | + | LncBook   | antisense | Lung cancer |
| TMPRSS2    | HSALNG0133211 | chr21 | 41476530  | 41477546  | + | LncBook   | antisense | Lung cancer |
| TMPRSS2    | HSALNG0133212 | chr21 | 41507464  | 41525499  | + | LncBook   | antisense | Lung cancer |
| TMPRSS2    | HSALNG0133213 | chr21 | 41520532  | 41536310  | - | LncBook   | sense     | Lung cancer |
| C1orf116   | HSALNG0010067 | chr1  | 207014830 | 207018900 | + | LncBook   | antisense | Lung cancer |
| C1orf116   | HSALNG0010068 | chr1  | 207023019 | 207024975 | - | LncBook   | sense     | Lung cancer |
| PPP1R9A    | HSALNG0059658 | chr7  | 94832135  | 95214946  | - | LncBook   | antisense | Lung cancer |
| PPP1R9A    | HSALNG0150006 | chr7  | 94925620  | 94928614  | - | StringTie | antisense | Lung cancer |
| PPP1R9A    | HSALNG0059659 | chr7  | 94998828  | 94999028  | + | LncBook   | sense     | Lung cancer |
| PPP1R9A    | HSALNG0059661 | chr7  | 95139240  | 95140188  | - | LncBook   | antisense | Lung cancer |
| PPP1R9A    | HSALNG0059662 | chr7  | 95204564  | 95205044  | + | LncBook   | sense     | Lung cancer |
| PPP1R9A    | HSALNG0059663 | chr7  | 95249844  | 95250053  | - | LncBook   | antisense | Lung cancer |
| PPP1R9A    | HSALNG0059664 | chr7  | 95267877  | 95268965  | - | LncBook   | antisense | Lung cancer |
| HNRNPA2B1  | HSALNG0056804 | chr7  | 26171511  | 26185286  | - | RefSeq    | sense     | Lung cancer |
| HNRNPA2B1  | HSALNG0056805 | chr7  | 26190128  | 26193374  | - | LncBook   | sense     | Lung cancer |
| HNRNPU-AS1 | HSALNG0012112 | chr1  | 244840243 | 244848912 | - | LncBook   | sense     | Lung cancer |
| HNRNPU-AS1 | HSALNG0012111 | chr1  | 244842636 | 244859006 | + | LncBook   | antisense | Lung cancer |

---

| Gene         | lncRNA        | Chr   | Start     | End       | S | DB      | Type      | Phenotype   |
|--------------|---------------|-------|-----------|-----------|---|---------|-----------|-------------|
| GBP5         | HSALNG0005054 | chr1  | 89260582  | 89269754  | + | LncBook | antisense | Lung cancer |
| RP11-973H7.3 | HSALNG0120116 | chr18 | 12670426  | 12671145  | - | LncBook | sense     | Late LUAD   |
| ACP6         | HSALNG0006818 | chr1  | 147628660 | 147637378 | + | LncBook | antisense | Late LUAD   |
| ACP6         | HSALNG0006821 | chr1  | 147642250 | 147647375 | + | LncBook | antisense | Late LUAD   |
| ZFYVE26      | HSALNG0102062 | chr14 | 67739105  | 67740073  | + | LncBook | antisense | Late LUAD   |
| ZFYVE26      | HSALNG0102064 | chr14 | 67759709  | 67760017  | - | LncBook | sense     | Late LUAD   |
| FN3KRP       | HSALNG0119469 | chr17 | 82717589  | 82718358  | + | LncBook | sense     | Late LUAD   |
| FN3KRP       | HSALNG0119471 | chr17 | 82728058  | 82734894  | - | LncBook | antisense | Late LUAD   |
| FN3KRP       | HSALNG0145189 | chr17 | 82728916  | 82732815  | + | RefSeq  | sense     | Late LUAD   |
| C7orf60      | HSALNG0060612 | chr7  | 112522268 | 112896625 | + | RefLnc  | antisense | Late LUAD   |
| C7orf60      | HSALNG0060627 | chr7  | 112903961 | 112905818 | - | LncBook | sense     | Late LUAD   |
| C7orf60      | HSALNG0060628 | chr7  | 112908741 | 112914098 | + | LncBook | antisense | Late LUAD   |
| C7orf60      | HSALNG0060629 | chr7  | 112915135 | 112915424 | - | LncBook | sense     | Late LUAD   |
| KIFAP3       | HSALNG0008363 | chr1  | 170021458 | 170022249 | - | LncBook | sense     | Late LUAD   |
| KIFAP3       | HSALNG0008364 | chr1  | 170024077 | 170024684 | + | LncBook | antisense | Late LUAD   |
| KIFAP3       | HSALNG0141960 | chr1  | 170041476 | 170046229 | + | RefSeq  | antisense | Late LUAD   |
| PLPPR2       | HSALNG0124019 | chr19 | 11355699  | 11356673  | + | LncBook | sense     | Late LUAD   |
| PLPPR2       | HSALNG0145851 | chr19 | 11363943  | 11364491  | - | FANTOM  | antisense | Late LUAD   |
| MECR         | HSALNG0141714 | chr1  | 29149139  | 29181819  | + | FANTOM  | antisense | Late LUAD   |
| MECR         | HSALNG0002110 | chr1  | 29178734  | 29179198  | - | LncBook | sense     | Late LUAD   |
| MECR         | HSALNG0002111 | chr1  | 29180743  | 29181058  | - | LncBook | sense     | Late LUAD   |
| MECR         | HSALNG0002112 | chr1  | 29185581  | 29189710  | - | LncBook | sense     | Late LUAD   |
| MECR         | HSALNG0002113 | chr1  | 29194795  | 29195790  | - | LncBook | sense     | Late LUAD   |

---

| Gene   | lncRNA        | Chr   | Start     | End       | S | DB         | Type      | Phenotype |
|--------|---------------|-------|-----------|-----------|---|------------|-----------|-----------|
| MECR   | HSALNG0002114 | chr1  | 29196158  | 29201447  | + | LncBook    | antisense | Late LUAD |
| MECR   | HSALNG0002115 | chr1  | 29202207  | 29222701  | - | LncBook    | sense     | Late LUAD |
| MECR   | HSALNG0002116 | chr1  | 29223267  | 29224817  | + | Gnomon     | antisense | Late LUAD |
| BPTF   | HSALNG0118319 | chr17 | 67802267  | 67825516  | - | StringTie  | antisense | Late LUAD |
| BPTF   | HSALNG0118321 | chr17 | 67826475  | 67827170  | + | LncBook    | sense     | Late LUAD |
| BPTF   | HSALNG0145355 | chr17 | 67853935  | 67854767  | - | FANTOM     | antisense | Late LUAD |
| BPTF   | HSALNG0118322 | chr17 | 67875779  | 67885428  | - | LncBook    | antisense | Late LUAD |
| BPTF   | HSALNG0118323 | chr17 | 67889911  | 67893556  | + | LncBook    | sense     | Late LUAD |
| BPTF   | HSALNG0118325 | chr17 | 67944958  | 67945197  | + | LncBook    | sense     | Late LUAD |
| BPTF   | HSALNG0118326 | chr17 | 67950885  | 67951746  | - | LncBook    | antisense | Late LUAD |
| BPTF   | HSALNG0145135 | chr17 | 67952287  | 68019973  | + | RefLnc     | sense     | Late LUAD |
| BPTF   | HSALNG0118327 | chr17 | 67955314  | 67957291  | + | LncBook    | sense     | Late LUAD |
| STIM2  | HSALNG0033503 | chr4  | 26858288  | 26858953  | + | LncBook    | sense     | Late LUAD |
| STIM2  | HSALNG0033504 | chr4  | 26859624  | 26860662  | - | BestRefSeq | antisense | Late LUAD |
| STIM2  | HSALNG0033505 | chr4  | 26861722  | 26992923  | - | LncBook    | antisense | Late LUAD |
| STIM2  | HSALNG0033510 | chr4  | 27025314  | 27025765  | - | LncBook    | antisense | Late LUAD |
| BAIAP2 | HSALNG0119188 | chr17 | 80339898  | 81355859  | - | LncBook    | antisense | Late LUAD |
| BAIAP2 | HSALNG0119225 | chr17 | 81029988  | 81060973  | + | LncBook    | sense     | Late LUAD |
| BAIAP2 | HSALNG0119227 | chr17 | 81110413  | 81113855  | - | LncBook    | antisense | Late LUAD |
| APOE   | HSALNG0126510 | chr19 | 44908869  | 44910640  | - | LncBook    | antisense | Late LUAD |
| APOE   | HSALNG0126511 | chr19 | 44909375  | 44919349  | + | HAVANA     | sense     | Late LUAD |
| CALCRL | HSALNG0020989 | chr2  | 187003220 | 187558051 | + | LncBook    | antisense | Late LUSC |
| CALCRL | HSALNG0020993 | chr2  | 187342021 | 187343228 | + | LncBook    | antisense | Late LUSC |

---

| Gene  | lncRNA        | Chr   | Start    | End      | S | DB      | Type      | Phenotype |
|-------|---------------|-------|----------|----------|---|---------|-----------|-----------|
| KDM2A | HSALNG0085103 | chr11 | 67074415 | 67148263 | + | LncBook | sense     | Late LUSC |
| KDM2A | HSALNG0143005 | chr11 | 67123304 | 67124431 | + | FANTOM  | sense     | Late LUSC |
| KDM2A | HSALNG0085111 | chr11 | 67154732 | 67156889 | + | LncBook | sense     | Late LUSC |
| KDM2A | HSALNG0085112 | chr11 | 67185879 | 67186130 | + | LncBook | sense     | Late LUSC |
| KDM2A | HSALNG0085113 | chr11 | 67188158 | 67188667 | + | LncBook | sense     | Late LUSC |
| KDM2A | HSALNG0143205 | chr11 | 67252336 | 67261545 | - | HAVANA  | antisense | Late LUSC |
| KDM2A | HSALNG0085117 | chr11 | 67256131 | 67258341 | - | LncBook | antisense | Late LUSC |

---

## Supplementary Table S3

**Dark biomarkers of the late-stage lung cancers.** The dark biomarkers were detected in LUAD and LUSC (denoted in the column “Subtype”), respectively. The columns “ID” and “Gene” gave the ENSEMBL ID and gene symbol of each detected dark biomarker. The columns “mqTrans-p” and “raw-p” gave the statistical t-test p-values of the engineered mqTrans values and the original expression levels of each dark biomarker in the late-stage lung cancers compared with the early-stage lung cancers of the same subtype. The chromosome, start position, end position, and strand of each dark biomarker were listed in the last five columns “Chr”, “Start”, “End”, and “S”.

| Subtype | ID              | Gene         | mqTrans-p | raw-p  | Chr   | Start     | End       | S |
|---------|-----------------|--------------|-----------|--------|-------|-----------|-----------|---|
| LUAD    | ENSG00000267249 | RP11-973H7.3 | 8.28E-04  | 0.4012 | chr18 | 12670426  | 12671145  | - |
| LUAD    | ENSG00000162836 | ACP6         | 1.24E-03  | 0.0638 | chr1  | 147629652 | 147670524 | - |
| LUAD    | ENSG00000072121 | ZFYVE26      | 2.02E-03  | 0.0617 | chr14 | 67727374  | 67816590  | - |
| LUAD    | ENSG00000141560 | FN3KRP       | 3.20E-03  | 0.2761 | chr17 | 82716706  | 82730328  | + |
| LUAD    | ENSG00000164603 | C7orf60      | 3.95E-03  | 0.4486 | chr7  | 112819147 | 112939875 | - |
| LUAD    | ENSG00000138030 | KHK          | 5.22E-03  | 0.1535 | chr2  | 27086747  | 27100762  | + |
| LUAD    | ENSG00000075945 | KIFAP3       | 5.22E-03  | 0.2720 | chr1  | 169921326 | 170085208 | - |
| LUAD    | ENSG00000105520 | PLPPR2       | 5.94E-03  | 0.1081 | chr19 | 11355386  | 11365698  | + |
| LUAD    | ENSG00000116353 | MECR         | 1.12E-02  | 0.0730 | chr1  | 29167696  | 29230942  | - |
| LUAD    | ENSG00000171634 | BPTF         | 1.83E-02  | 0.0973 | chr17 | 67825503  | 67984378  | + |
| LUAD    | ENSG00000109689 | STIM2        | 2.23E-02  | 0.0926 | chr4  | 26857601  | 27025381  | + |
| LUAD    | ENSG00000134072 | CAMK1        | 2.37E-02  | 0.7634 | chr3  | 9757347   | 9769992   | - |
| LUAD    | ENSG00000175866 | BAIAP2       | 3.91E-02  | 0.1469 | chr17 | 81035122  | 81117434  | + |
| LUAD    | ENSG00000130203 | APOE         | 4.80E-02  | 0.4755 | chr19 | 44905791  | 44909393  | + |



---

|      |                 |        |          |        |       |           |           |   |
|------|-----------------|--------|----------|--------|-------|-----------|-----------|---|
| LUSC | ENSG00000064989 | CALCRL | 2.34E-02 | 0.0651 | chr2  | 187341964 | 187448460 | - |
| LUSC | ENSG00000173120 | KDM2A  | 3.22E-02 | 0.7282 | chr11 | 67119263  | 67258082  | + |

## Supplementary Table S4

**Dark biomarkers of the GSE190725 endocrine cells and endocrine progenitor.** The "bulk" and "sc" stand for bulk RNA-seq dataset and scRNA-seq dataset, "overlap " represents the same dark biomarker in both datasets, where 1 means it is an overlap gene and 0 is not.

| GSE190725 endocrine cells |              | overlap | GSE190725 endocrine progenitor |              | overlap |
|---------------------------|--------------|---------|--------------------------------|--------------|---------|
| bulk                      | sc           |         | bulk                           | sc           |         |
| 1255_g_at                 | 1320_at      | 0       | 1431_at                        | 1552257_a_at | 1       |
| 1552261_at                | 1431_at      | 0       | 1552256_a_at                   | 1552261_at   | 1       |
| 1552266_at                | 1494_f_at    | 0       | 1552257_a_at                   | 1552264_a_at | 0       |
| 1552274_at                | 1552263_at   | 0       | 1552261_at                     | 1552278_a_at | 0       |
| 1552289_a_at              | 1552269_at   | 0       | 1552271_at                     | 1552281_at   | 0       |
| 1552293_at                | 1552277_a_at | 0       | 1552275_s_at                   | 1552283_s_at | 0       |
| 1552302_at                | 1552306_at   | 0       | 1552276_a_at                   | 1552301_a_at | 1       |
| 1552304_at                | 1552307_a_at | 0       | 1552280_at                     | 1552303_a_at | 0       |
| 1552310_at                | 1552315_at   | 0       | 1552286_at                     | 1552309_a_at | 0       |

---

|              |              |   |              |              |   |
|--------------|--------------|---|--------------|--------------|---|
| 1552314_a_at | 1552318_at   | 0 | 1552301_a_at | 1552314_a_at | 0 |
| 1552329_at   | 1552319_a_at | 0 | 1552304_at   | 1552315_at   | 0 |
| 1552332_at   | 1552323_s_at | 0 | 1552310_at   | 1552316_a_at | 0 |
| 1552334_at   | 1552344_s_at | 1 | 1552319_a_at | 1552319_a_at | 1 |
| 1552344_s_at | 1552348_at   | 0 | 1552332_at   | 1552320_a_at | 0 |
| 1552355_s_at | 1552370_at   | 1 | 1552344_s_at | 1552326_a_at | 0 |
| 1552360_a_at | 1552373_s_at | 1 | 1552347_at   | 1552329_at   | 0 |
| 1552362_a_at | 1552399_a_at | 0 | 1552349_a_at | 1552343_s_at | 0 |
| 1552370_at   | 1552412_a_at | 0 | 1552355_s_at | 1552347_at   | 1 |
| 1552372_at   | 1552438_a_at | 0 | 1552367_a_at | 1552348_at   | 0 |
| 1552373_s_at | 1552440_at   | 1 | 1552373_s_at | 1552362_a_at | 0 |
| 1552396_at   | 1552448_a_at | 0 | 1552379_at   | 1552377_s_at | 0 |
| 1552398_a_at | 1552491_at   | 0 | 1552386_at   | 1552381_at   | 0 |
| 1552415_a_at | 1552493_s_at | 0 | 1552394_a_at | 1552383_at   | 0 |
| 1552421_a_at | 1552494_at   | 0 | 1552395_at   | 1552390_a_at | 0 |
| 1552440_at   | 1552501_a_at | 0 | 1552409_a_at | 1552410_at   | 0 |
| 1552449_a_at | 1552502_s_at | 0 | 1552412_a_at | 1552412_a_at | 1 |
| 1552450_a_at | 1552508_at   | 0 | 1552418_at   | 1552424_at   | 0 |
| 1552458_at   | 1552518_s_at | 0 | 1552440_at   | 1552432_at   | 0 |

---

|              |              |   |              |              |   |
|--------------|--------------|---|--------------|--------------|---|
| 1552459_a_at | 1552523_a_at | 0 | 1552449_a_at | 1552450_a_at | 0 |
| 1552463_at   | 1552538_a_at | 0 | 1552453_a_at | 1552461_at   | 0 |
| 1552468_a_at | 1552557_a_at | 0 | 1552457_a_at | 1552466_x_at | 0 |
| 1552474_a_at |              |   | 1552458_at   | 1552468_a_at | 0 |
| 1552489_s_at |              |   | 1552459_a_at | 1552486_s_at | 0 |
| 1552510_at   |              |   | 1552470_a_at | 1552504_a_at | 0 |
| 1552514_at   |              |   | 1552472_a_at | 1552511_a_at | 0 |
| 1552521_a_at |              |   | 1552473_at   | 1552528_at   | 0 |
| 1552524_at   |              |   | 1552482_at   | 1552532_a_at | 0 |
| 1552546_a_at |              |   | 1552485_at   | 1552540_s_at | 1 |
| 1552563_a_at |              |   | 1552501_a_at | 1552544_at   | 0 |
| 1552566_at   |              |   | 1552506_at   | 1552557_a_at | 0 |
|              |              |   | 1552514_at   |              |   |
|              |              |   | 1552518_s_at |              |   |
|              |              |   | 1552535_at   |              |   |
|              |              |   | 1552540_s_at |              |   |
|              |              |   | 1552548_at   |              |   |

## Supplementary Figure S1

Distributions of the t-test p-values of the original expression levels and the mqTrans values of the 13 dark biomarkers. The vertical axis was the “ $-\log_{10}()$ ” scale of the t-test p-values, while the horizontal axis listed the 13 dark biomarkers. Some bins of the weak dark biomarkers may show smaller heights due to that they were not differentially expressed there. A higher bar suggested a more significant difference between the lung cancer and control groups. Some bars were not recognizable due to that they didn't show differential expressions. The horizontal line was plotted for  $-\log_{10}(0.05)$  as a baseline boundary.

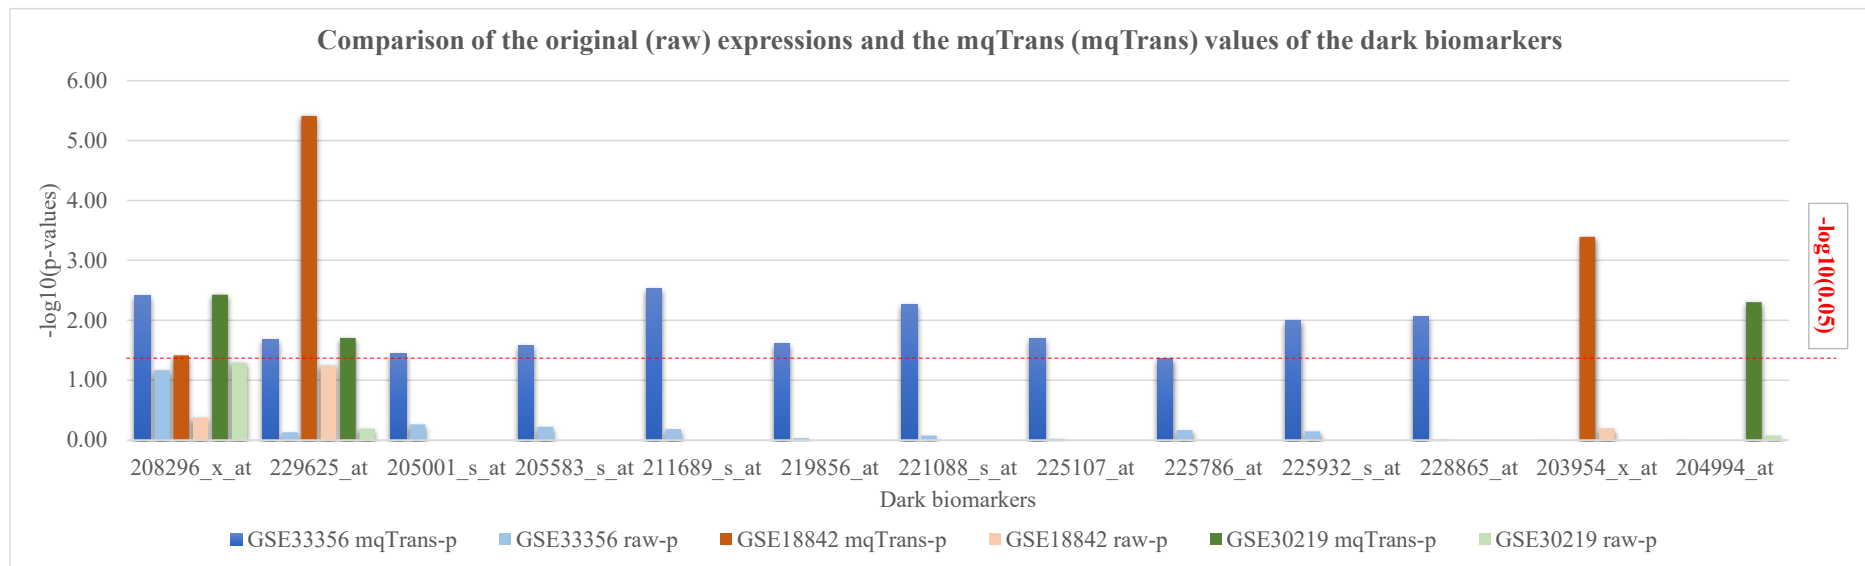

---

## **Supplementary Figure S2**

Expression profiles of the two strong dark biomarkers GBP5 and TNFAIP8. Gene expression profiles of (a) GBP5 and (b) TNFAIP8 across different organs were retrieved from the database GTEx Portal. The gene expression profiles of (c) GBP5 and (d) TNFAIP8 across different cancer types compared against their matched normal samples were retrieved from the GEPIA database using the TCGA data. The body map and average expression levels of each strong dark biomarker across different cancer types and the matched normal samples were illustrated. The expression levels were in the log scale.

Bulk tissue gene expression for GBP5 (ENSG00000154451.14)

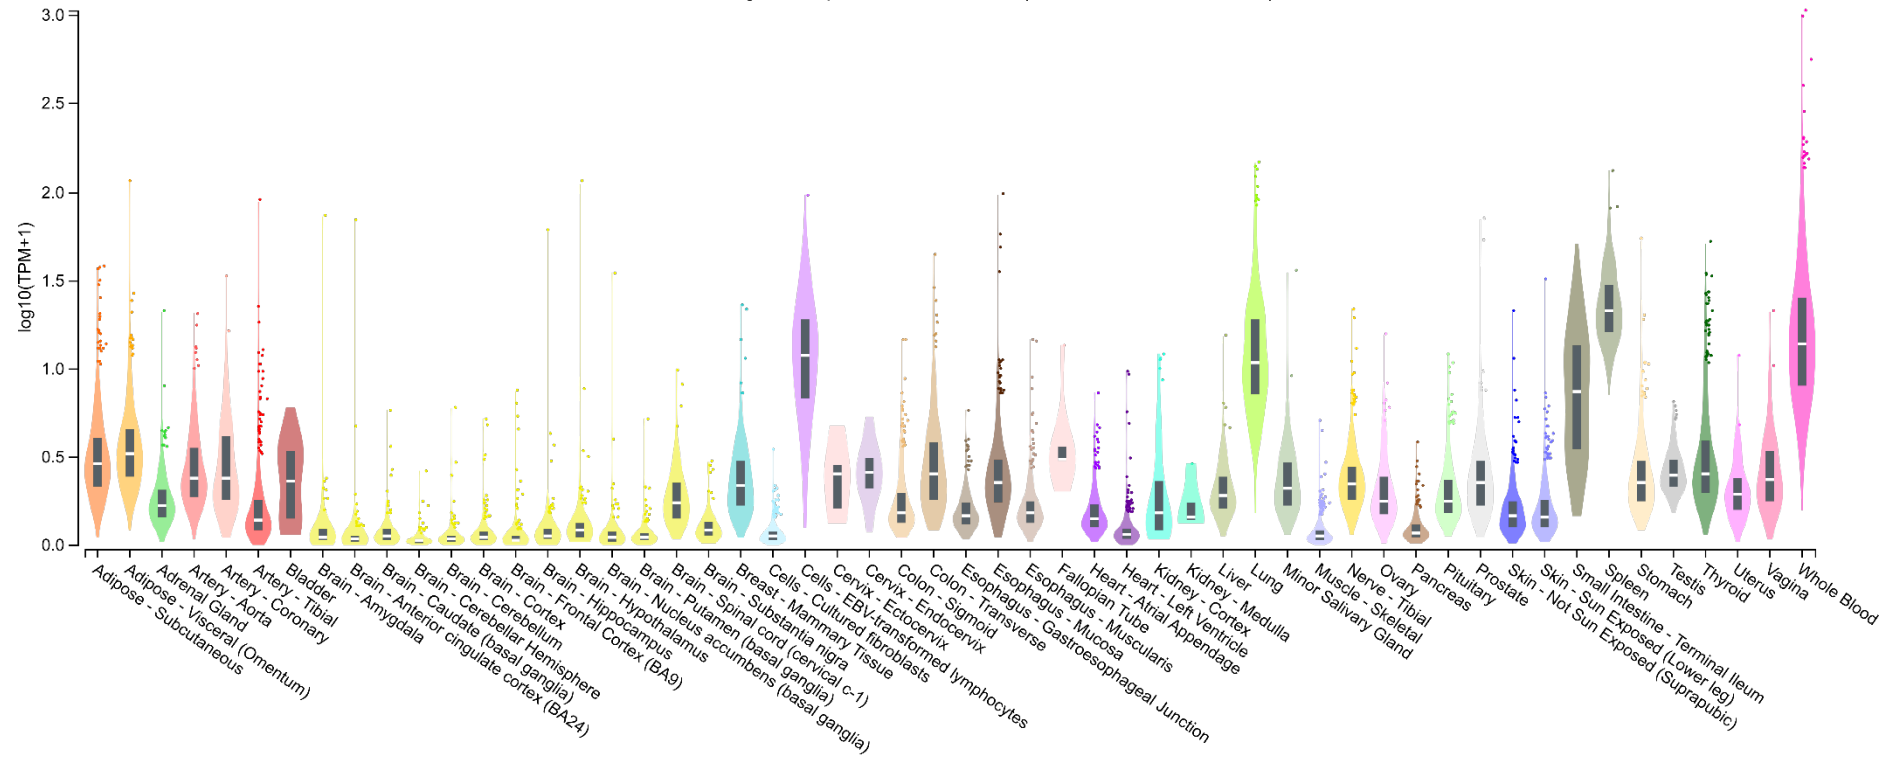

(a)

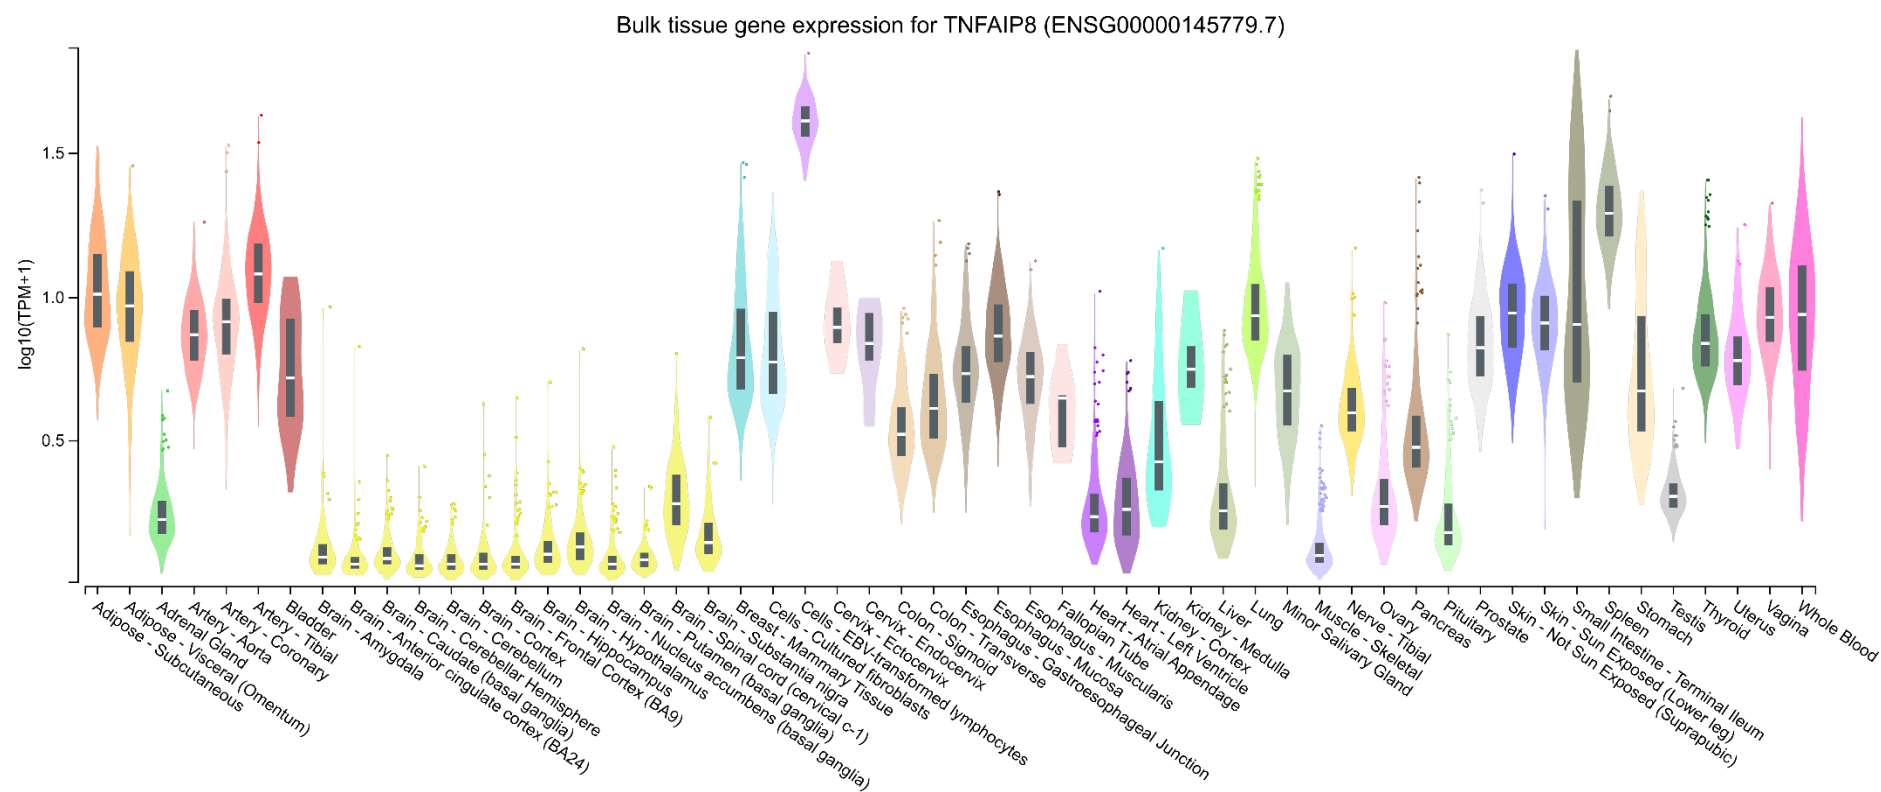

(b)

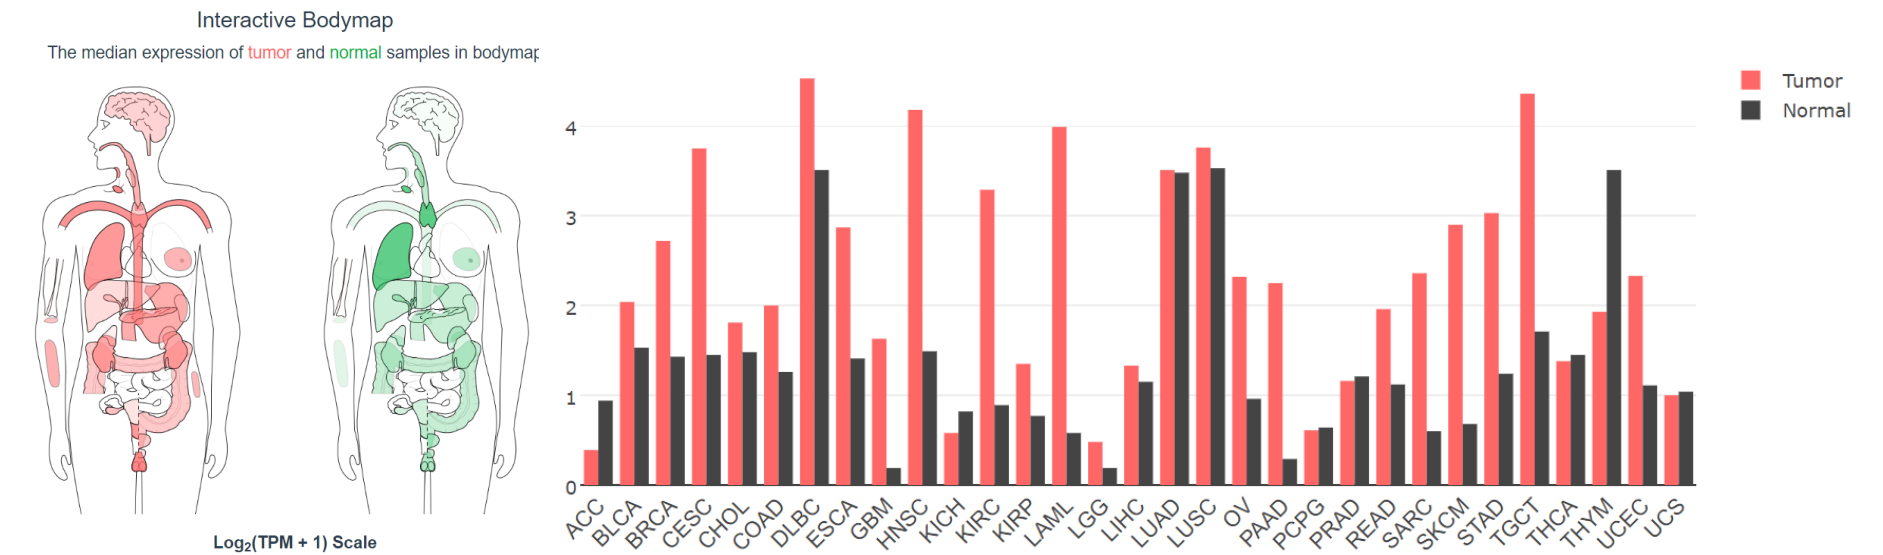

(c)



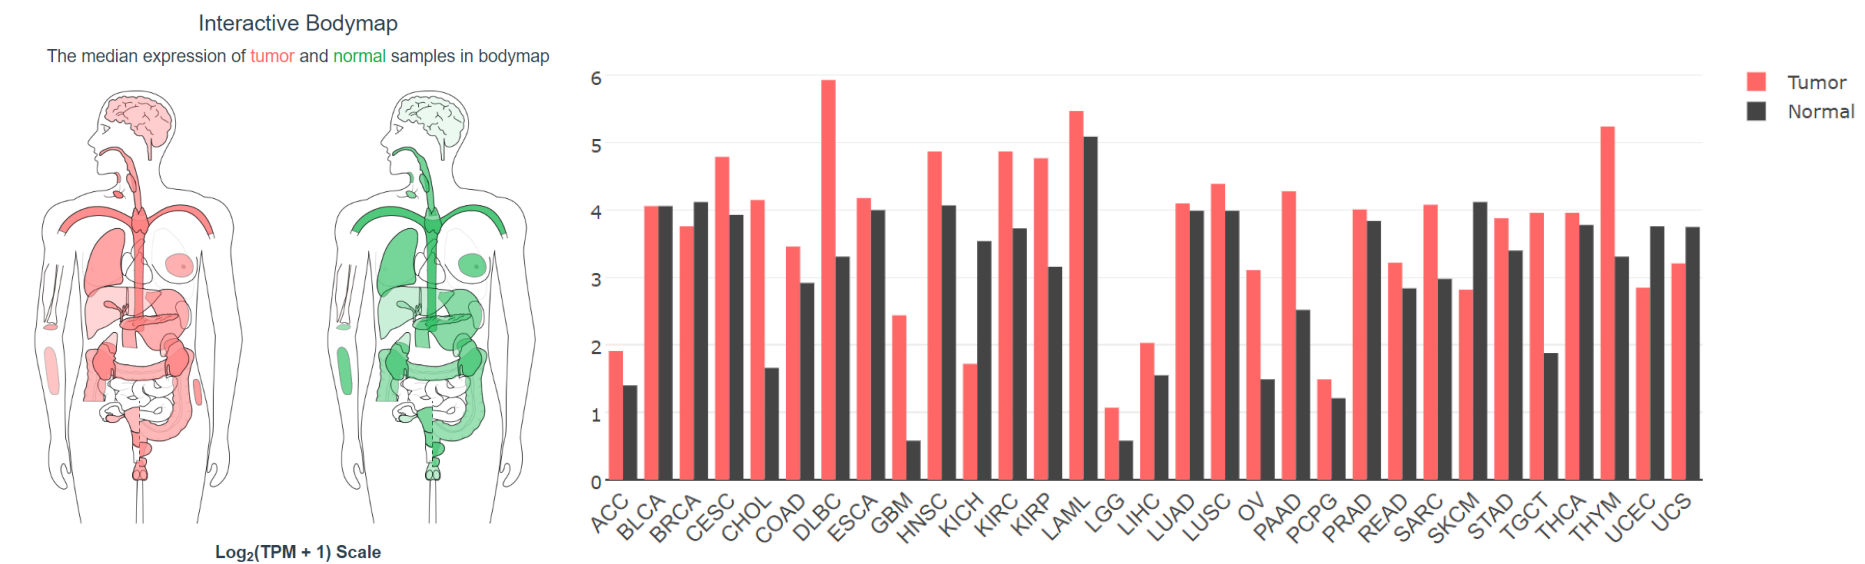

(d)

### Supplementary Figure S3

Expression levels of the novel transcript ENSG00000267249 (gene symbol: RP11-973H7.3) across different organs. The data was retrieved from the UCSC Genome Browser [1].

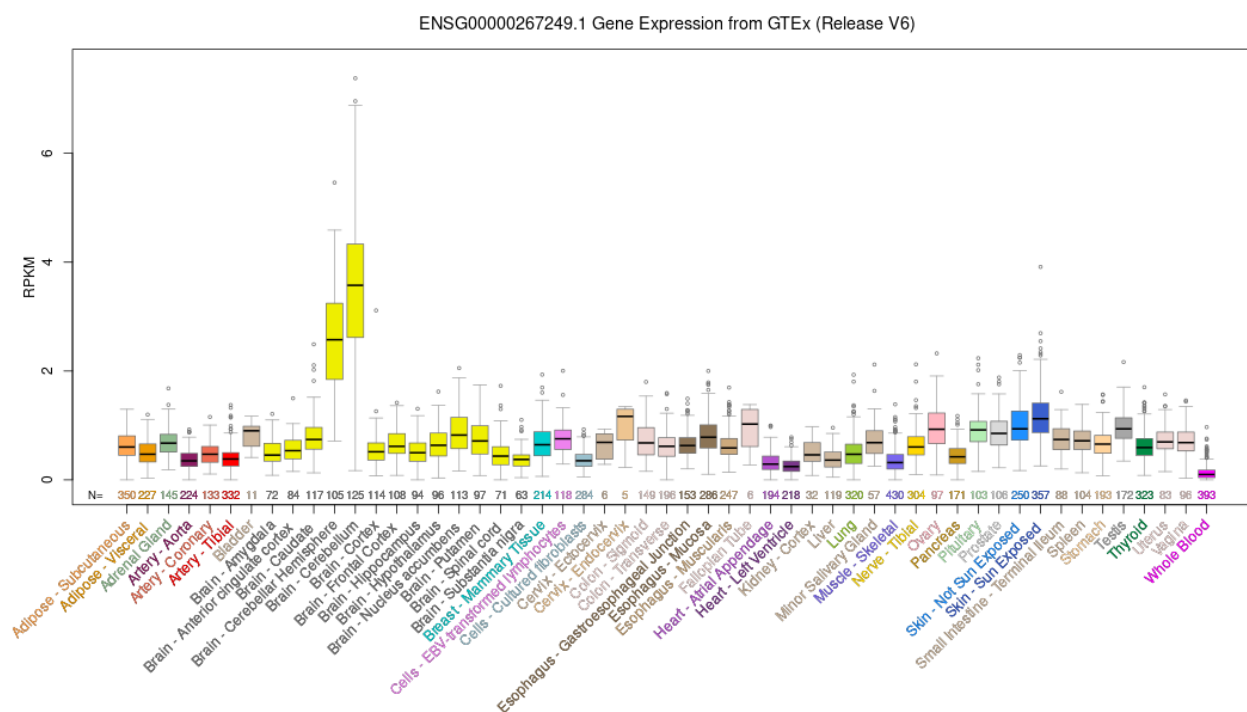

## Supplementary Figure S4

Kaplan Meier (KM) survival analysis of the 16 dark biomarkers of the two lung cancer subtypes LUAD and LUSC. Each sub-figure gave the KM plots of the original expression levels and the mqTrans values of each dark biomarker on the left and right parts, respectively.

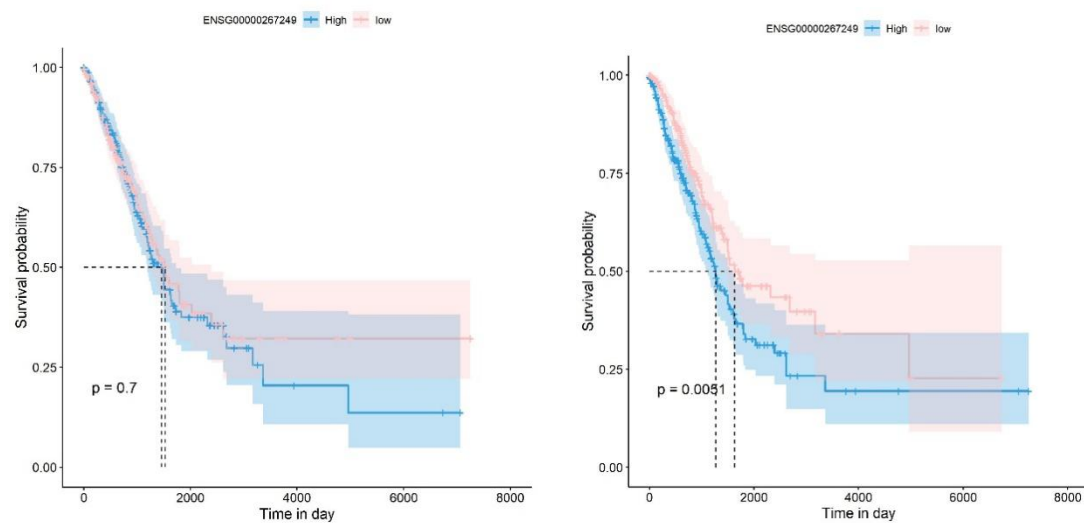

(a) ENSG00000267249 in LUAD

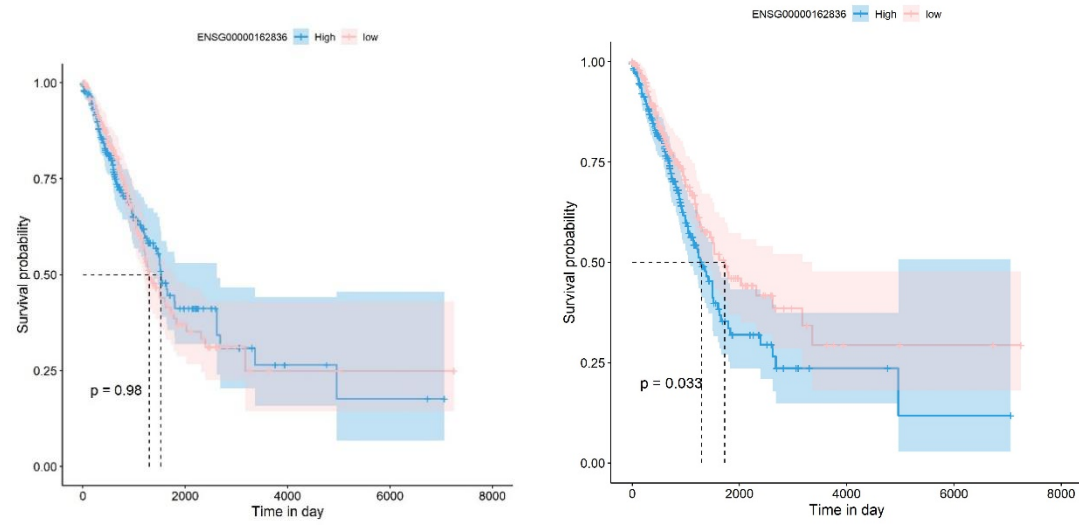

(b) ENSG00000162836 in LUAD

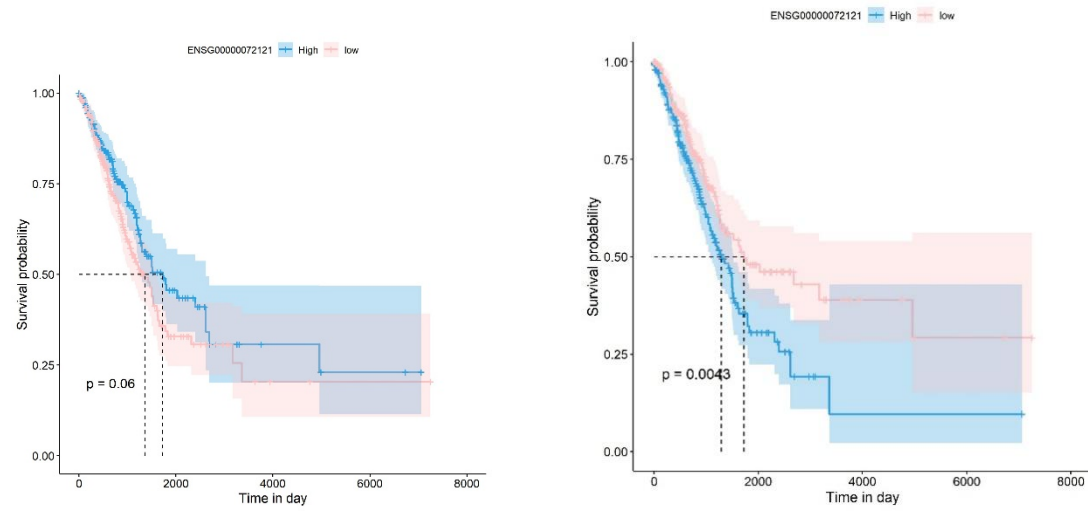

(c) ENSG00000072121 in LUAD

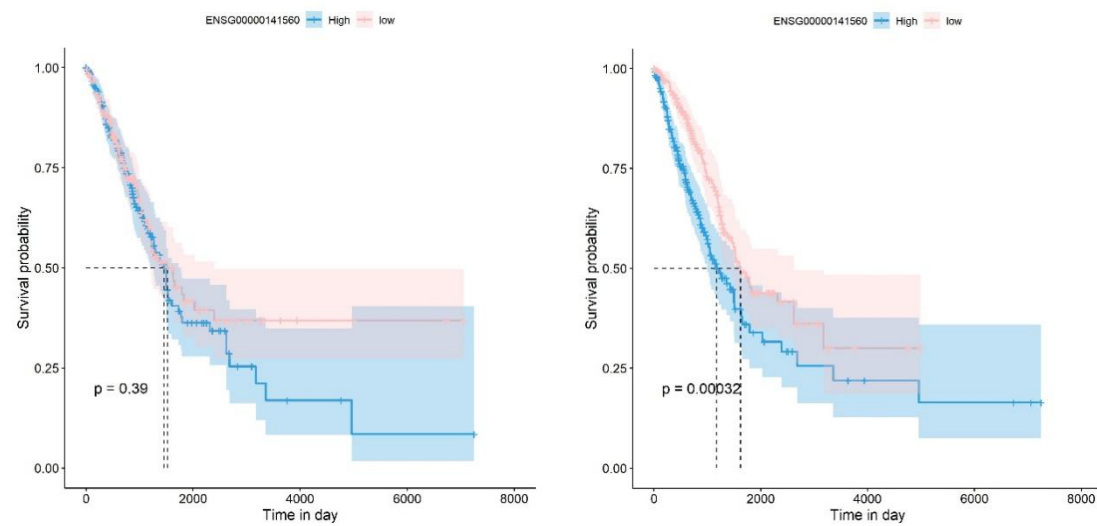

(d) ENSG00000141560 in LUAD: Original on the left, mqTrans on the right

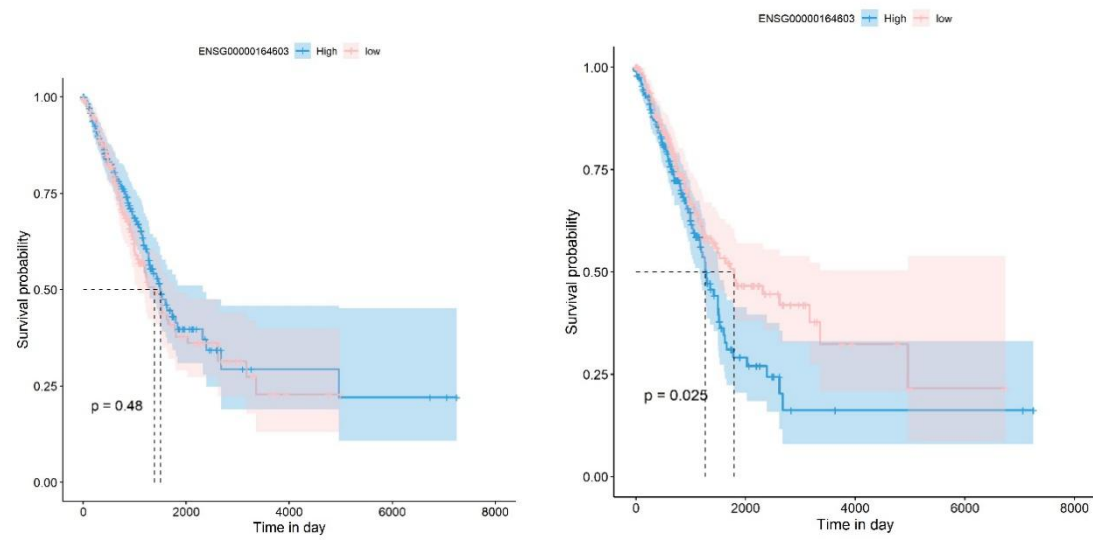

(e) ENSG00000164603 in LUAD

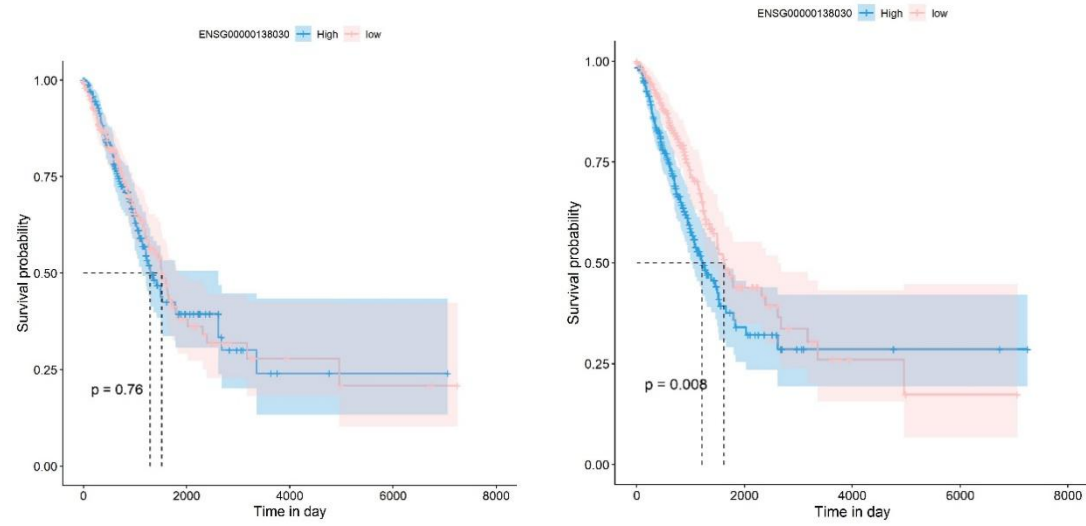

(f) ENSG00000138030 in LUAD



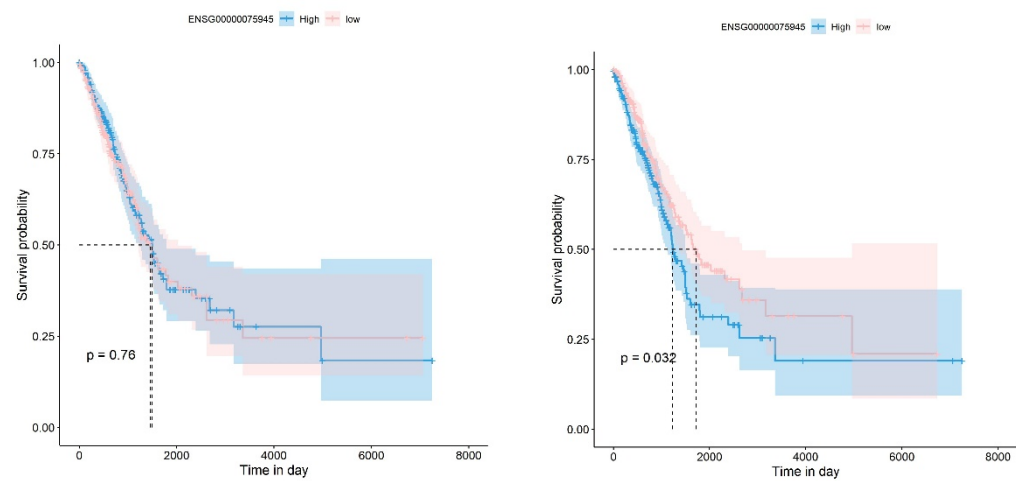

(g) ENSG00000075945 in LUAD

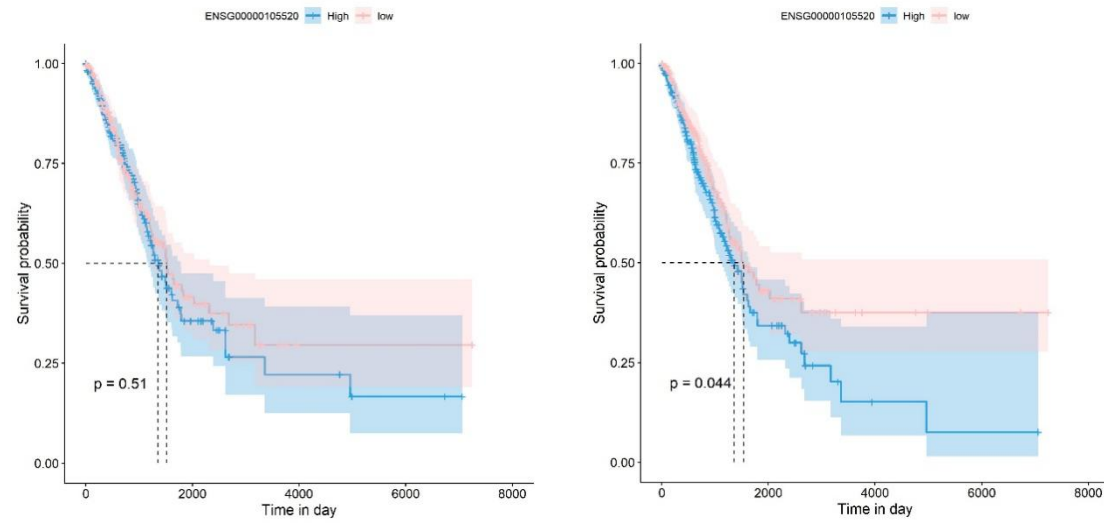

(h) ENSG00000105520 in LUAD

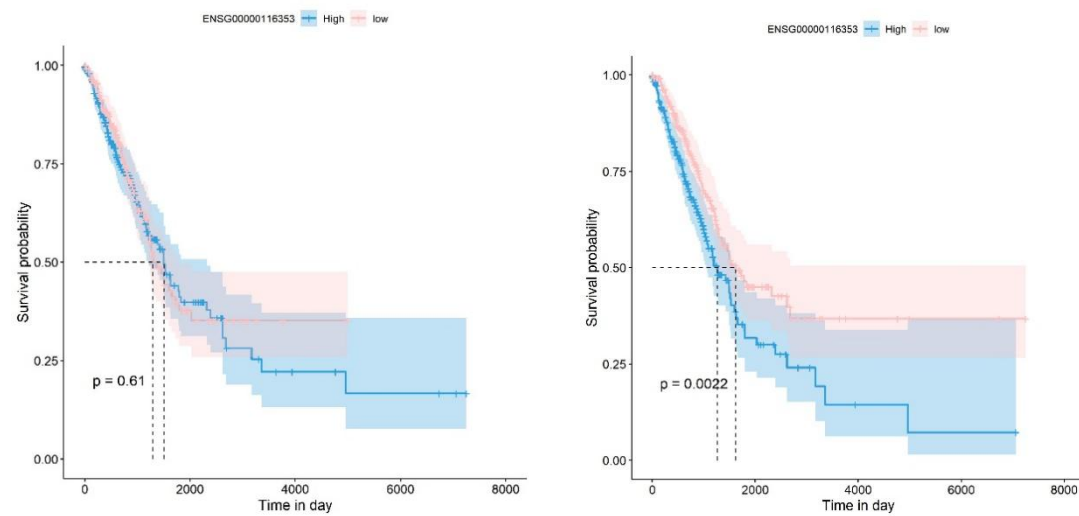

(i) ENSG00000116353 in LUAD

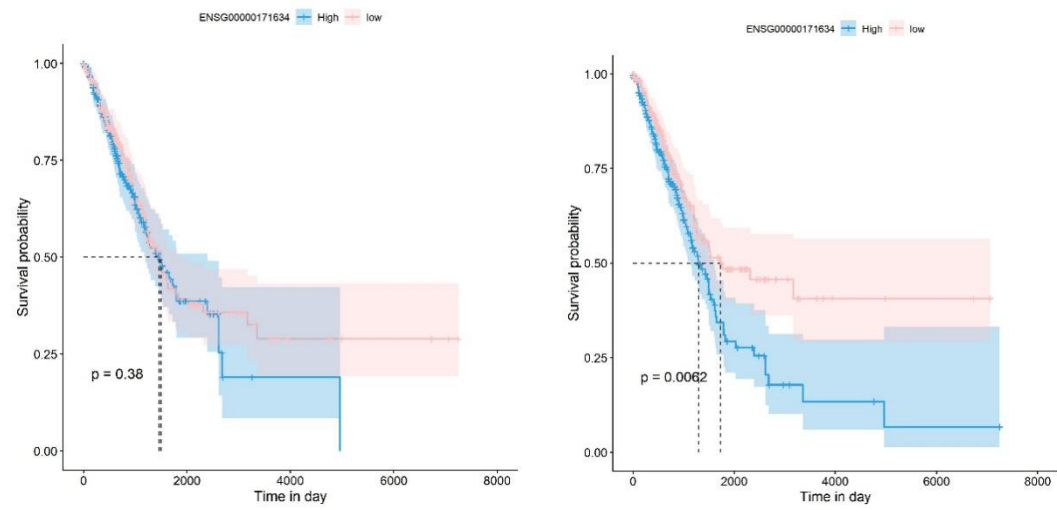

(j) ENSG00000171634 in LUAD

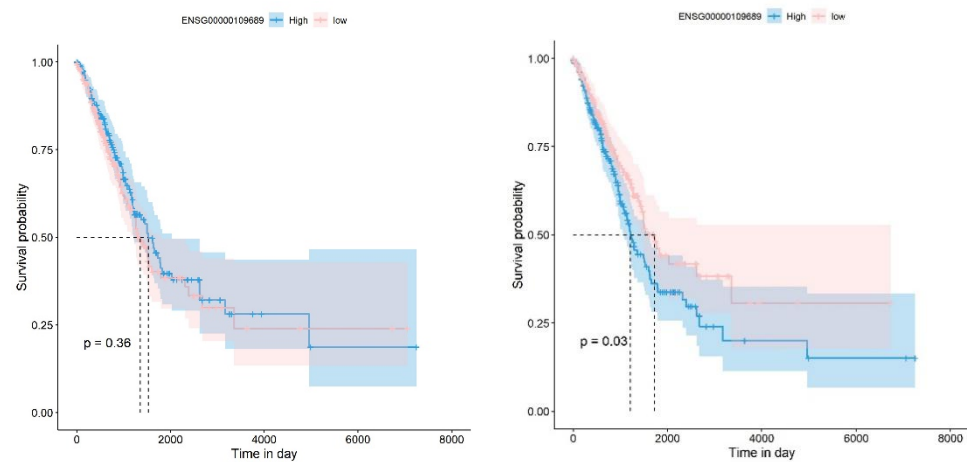

(k) ENSG00000109689 in LUAD

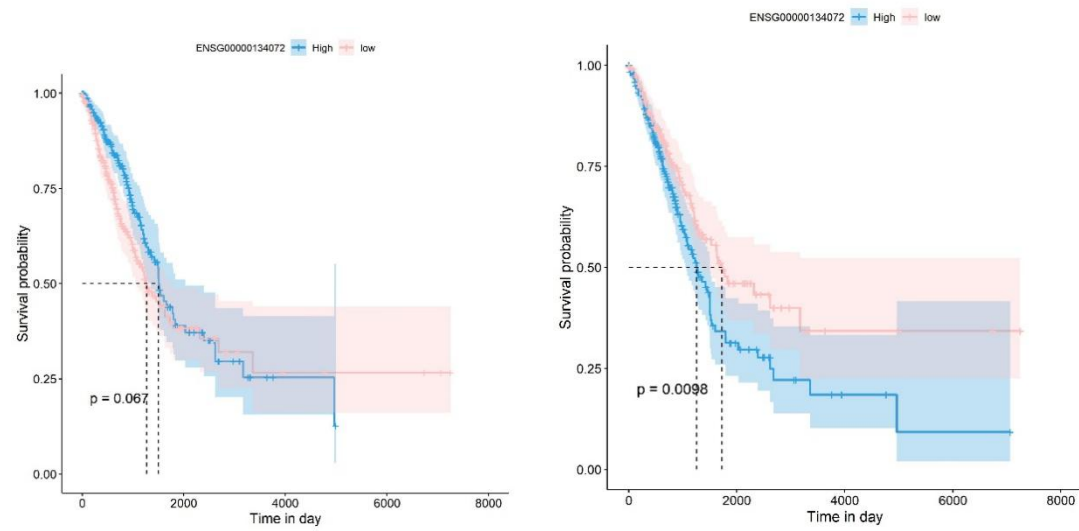

(l) ENSG00000134072 in LUAD

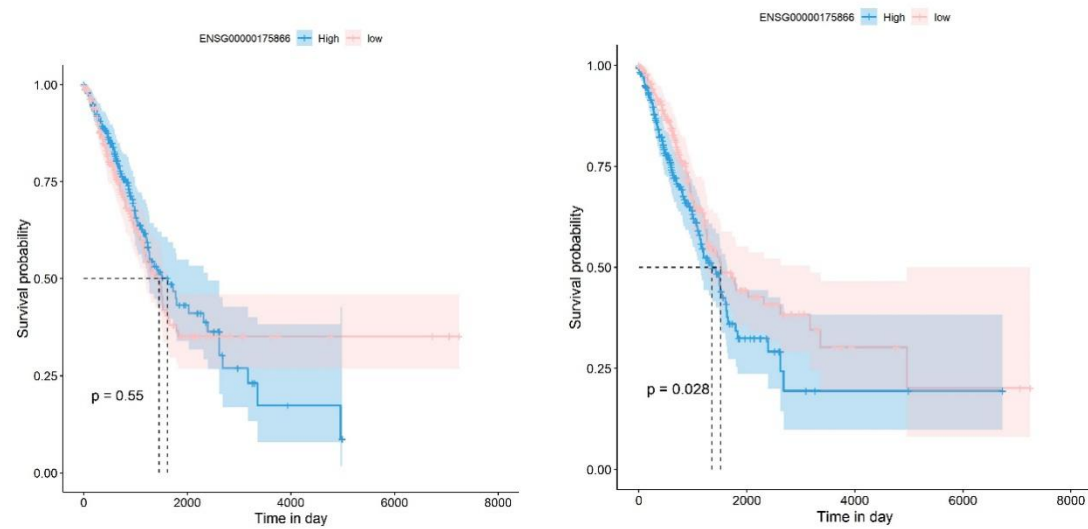

(m) ENSG00000175866 in LUAD

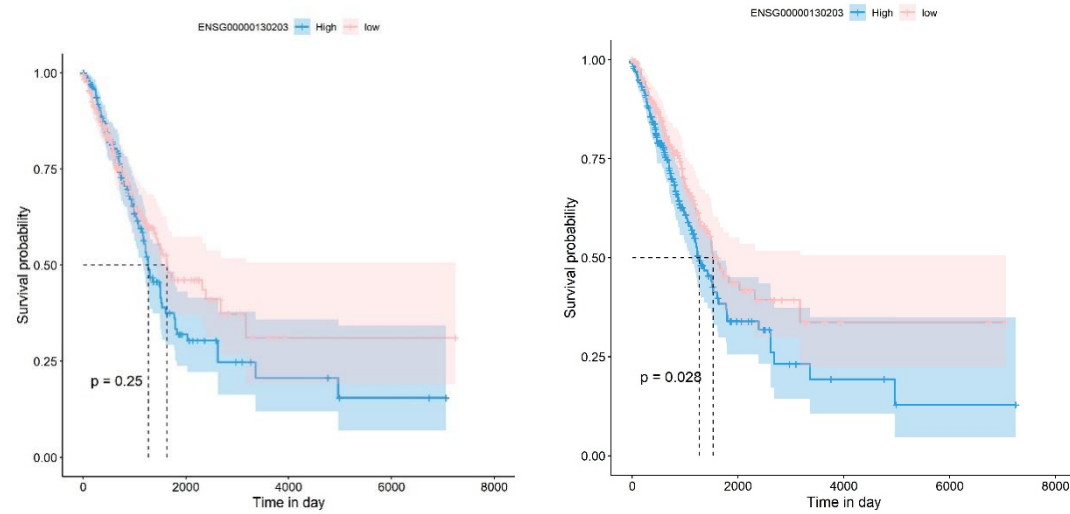

(n) ENSG00000130203 in LUAD



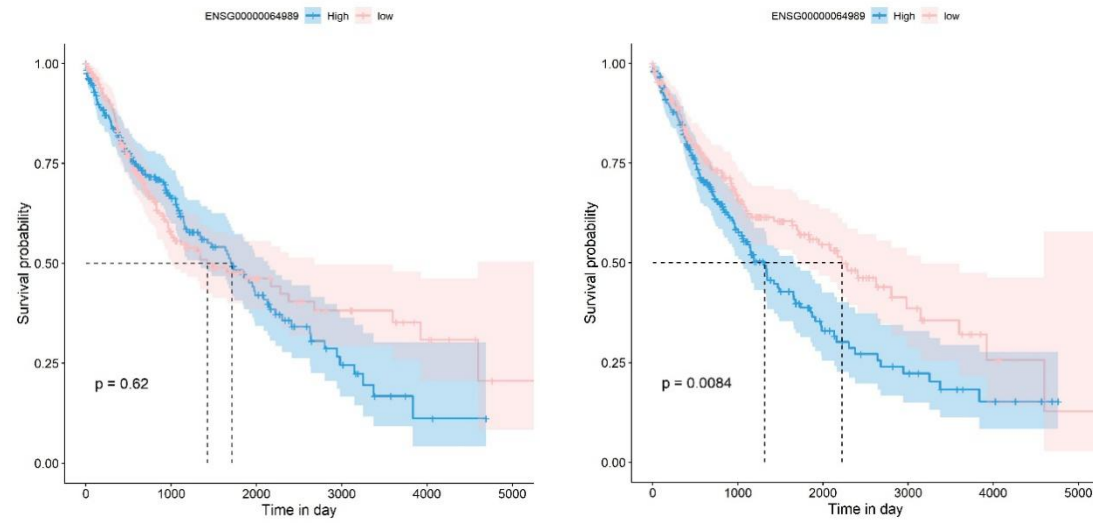

(o) ENSG00000064989 in LUSC

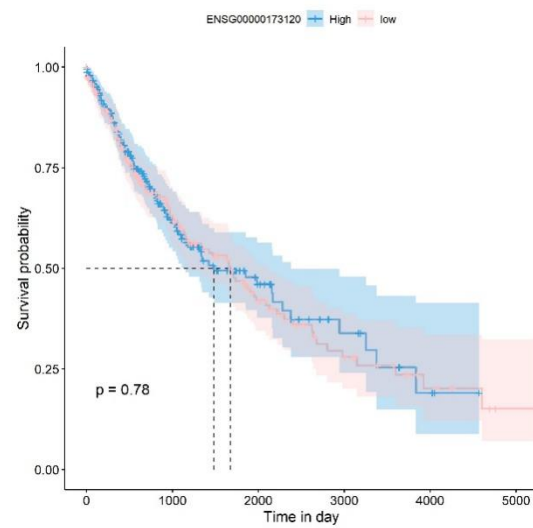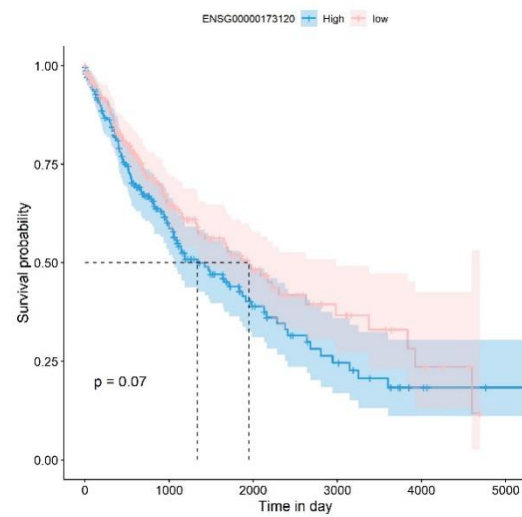

(p) ENSG00000173120 in LUSC

## Supplementary Figure S5

Expression profiles of the two strong dark biomarkers (GBP5 and TNFAIP8) and two biomarker genes (CD200 and CD200R1) differentially expressed in lung cancer. The gene expression profiles of (a) GBP5, (b) TNFAIP8, (c) CD200 and (d) CD200R1 across different cancer types compared against their matched normal samples were retrieved from the GEPIA database using the TCGA data. The average expression levels of each gene across different cancer types and the matched normal samples were illustrated. The expression levels were in the log scale.

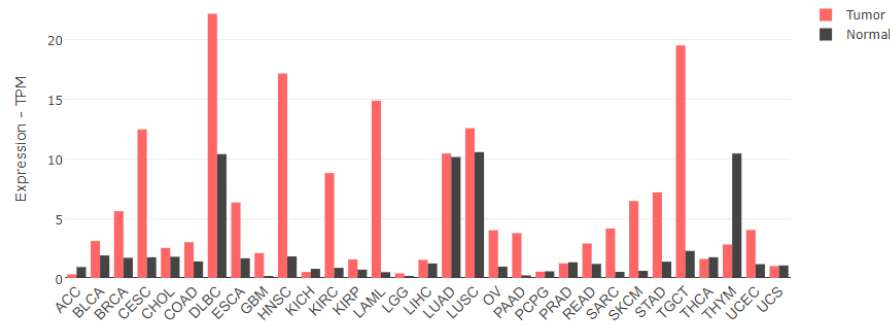

(a)

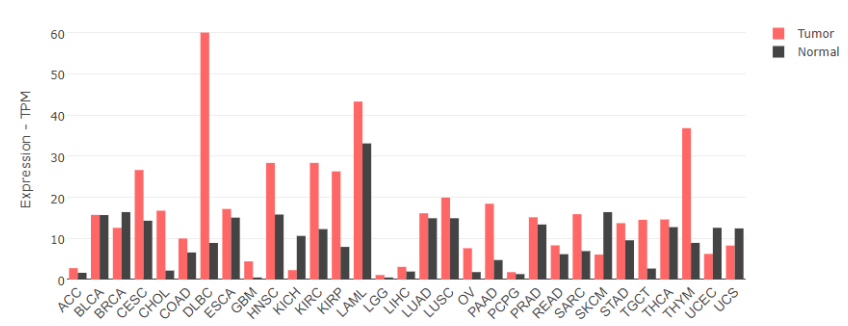

(b)

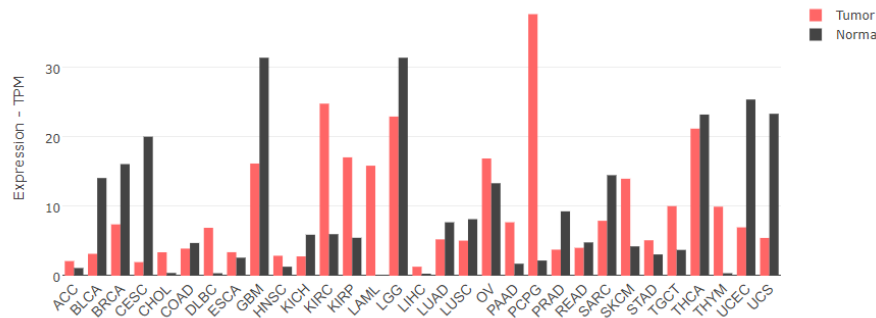

(c)

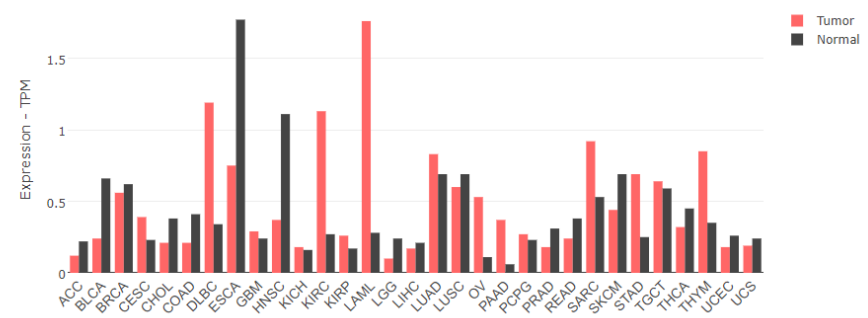

(d)

---

## References

1. Kent, W.J.; Sugnet, C.W.; Furey, T.S.; Roskin, K.M.; Pringle, T.H.; Zahler, A.M.; Haussler, D. The human genome browser at UCSC. *Genome Res* **2002**, *12*, 996-1006, doi:10.1101/gr.229102.
